## CORRESPONDENCE

Anesthesiology  
1996; 84:1530  
© 1996 American Society of Anesthesiologists, Inc.  
Lippincott-Raven Publishers

*In Reply:*—The main focus of my previous communication was to report a new and promising technique that might be of value in the anesthetic care of expremature high-risk patients. Therefore, the use of the laryngeal mask airway is likely to be of benefit not only for cryo- or laser treatment of retinopathy of the premature (ROP) but for other surgical procedures performed in expremature infants.

I agree with Pinsker and Sandborn that the use of local anesthetics deserves more widespread use in the setting of cryo- or laser treatment of ROP. After the submission of the report, we started to use topical local anesthetics as an adjunct to the laryngeal mask airway technique, with promising results intra- and postoperatively.

The second issue is whether expremature babies need anesthesia for procedures such as cryo- or laser treatment of ROP. There is an

ever-growing body of evidence that even the most premature children will react with a significant neuroendocrine stress reaction in response to various nociceptive stimulations or other stressful situations and that the lack of proper anesthesia can cause significant morbidity.<sup>1,\*</sup>

**P.A. Lönnqvist M.D., D.E.A.A.**

Clinical Director of Anaesthesia  
Department of Paediatric Anaesthesia and Intensive Care  
St. Göran's Children's Hospital/KS  
P.O. Box 12500  
S-112 81 Stockholm, Sweden

## Reference

1. Anand KJS: Relationship between stress responses and clinical outcome in newborns, infants and children. *Crit Care Med* 1993; 21:S358-9

(Accepted for publication March 20, 1996.)

\* Anand KJS, Aynsley-Green A: Metabolic and endocrine effects of surgical ligation of ductus arteriosus in the human preterm neonate: Are there implications for improvement of postoperative outcome. *Modern Problems in Pediatrics* 1985; 23:143-57.
